# Supplementary figures and images for: Insight into 6-aminopenicillanic acid structure and study of the quantum mechanical calculations of the acid–base site on γ-Fe2O3@SiO2core–shell nanocomposites and as efficient catalysts in multicomponent reactions
Source: Royal Society of Chemistry journal article supplement (doi:10.1039/d0nj02942d), 2020-01-01

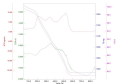

Supplement: d0nj02942d4.pdf [file d0nj02942d4.pdf]

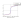

Supplement: d0nj02942d5.pdf [file d0nj02942d5.pdf]

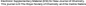

Supplement: d0nj02942d6.pdf [file d0nj02942d6.pdf]
